# Supplementary material for: Symbionts shape host innate immunity in honeybees
Source: PubMed Central journal article supplement (PMC7482289; doi:10.1098/rspb.2020.1184), 2020-08-26
Supplement: rspb20201184supp1.pdf [file rspb20201184supp1.pdf]

Supplementary figures for the article:

Title: Symbionts shape host innate immunity in honey bees

Authors: Richard D. Horak<sup>1\*</sup>, Sean P. Leonard<sup>1</sup>, Nancy A. Moran<sup>1\*</sup>

Affiliations: <sup>1</sup>Department of Integrative Biology, The University of Texas at Austin, Austin, Texas 78712, United States

\*Correspondence to: [rdhorak1@gmail.com](mailto:rdhorak1@gmail.com), [nancy.moran@austin.utexas.edu](mailto:nancy.moran@austin.utexas.edu)

DOI: 10.1098/rspb.2020.1184

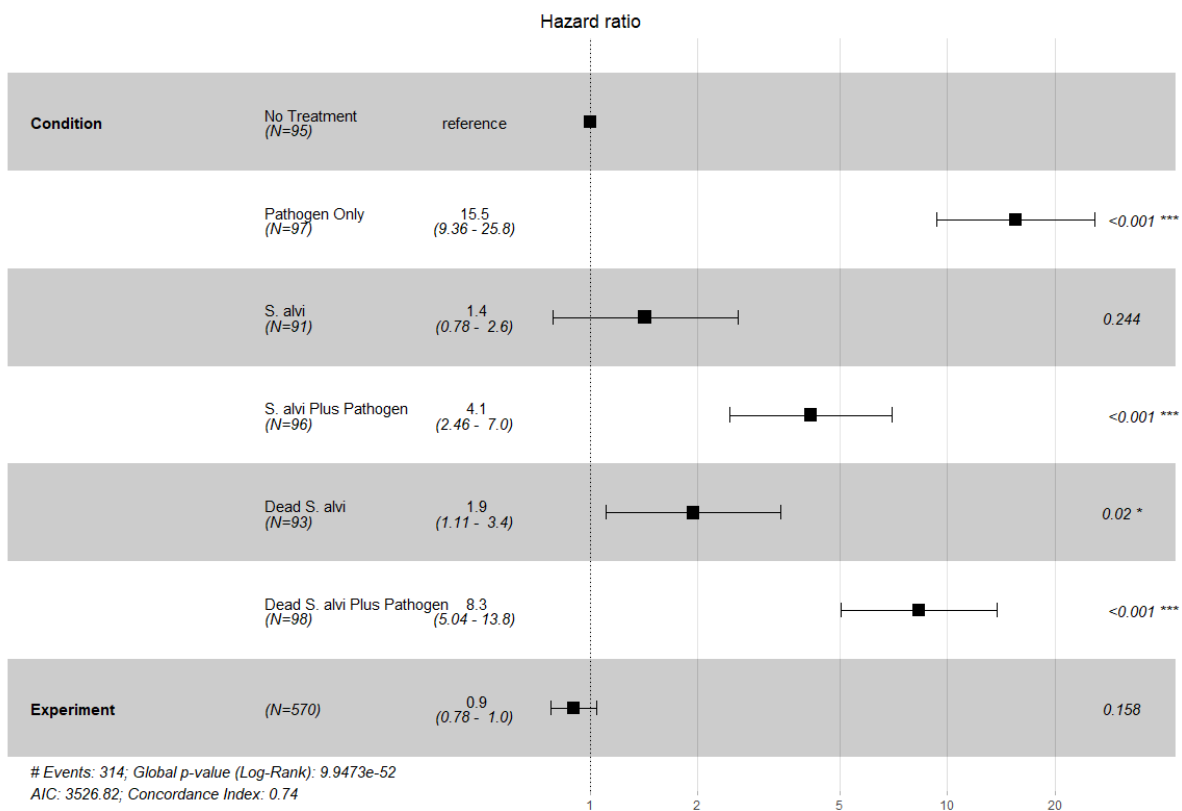

Supplementary Figure 1 Bees challenged by the pathogen *S. marcescens* have higher survival when pre-inoculated with *S. alvi*

Hazard plot detailing effect of honey bee treatment and replicate experiments on honey bee survival after inoculation with PBS or 5 ul of the pathogen *S. marcescens* at OD<sub>600</sub> = 1. Honey bees given no bacterial inoculum and no pathogen exposure used as a reference group. Bees treated with live *S. alvi* or heat-killed *S. alvi* without pathogen exposure were affected much less than honey bees exposed to the pathogen, regardless of prior treatment. Total N = 570 bees.

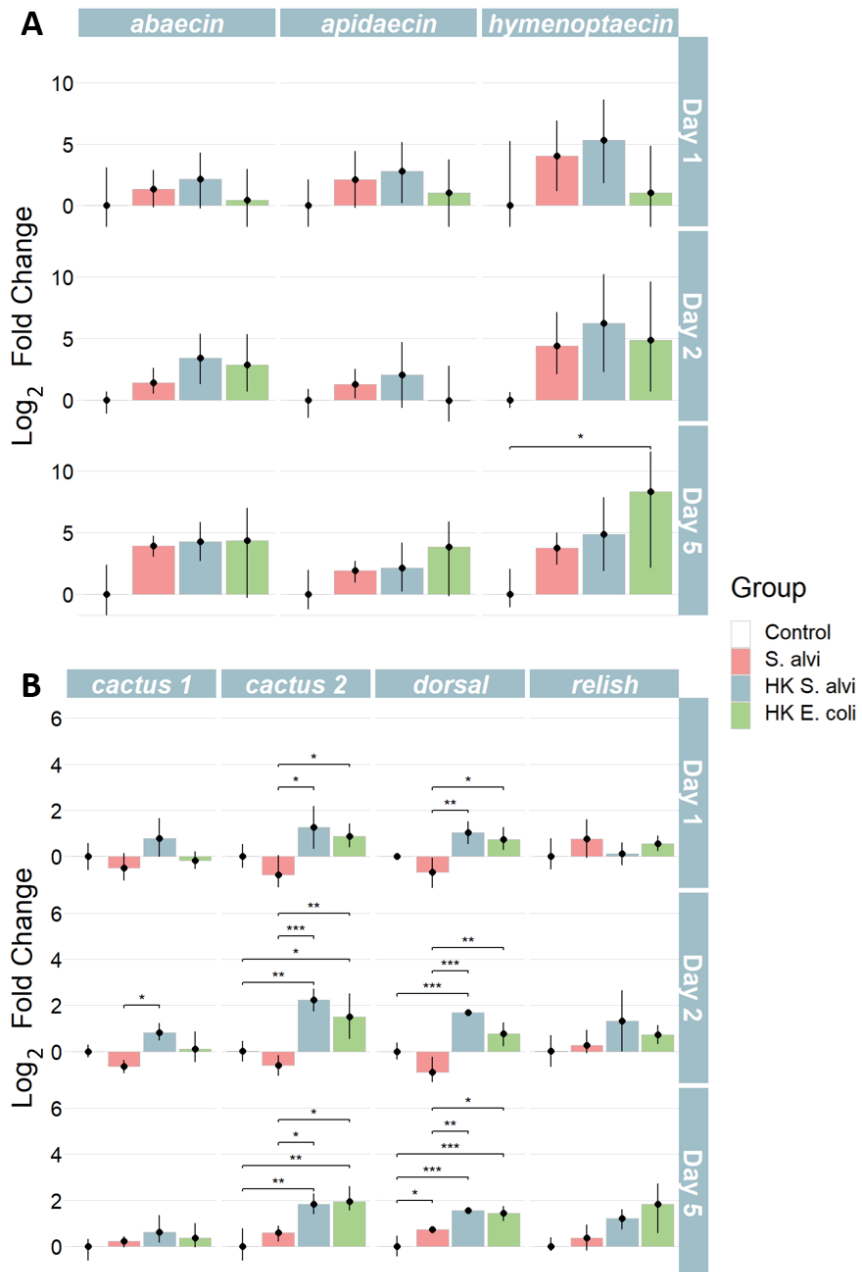

## Supplementary Figure 2 Live and heat-killed *S. alvi* trigger differential host immune gene expression

Bee gene expression relative to the housekeeping gene *RPS18* measured using qPCR from cDNA derived from bee whole abdomens 1,2, and 5 day(s) post treatment. HK = heat-killed. (A) Bees inoculated with live *S. alvi*, heat-killed *S. alvi*, and heat-killed *E. coli* trigger non-significant upregulation of AMPs compared to the uninoculated control group. (B) Bees inoculated with heat-killed *S. alvi* or *E. coli* had significantly higher expression of *cactus2* and *dorsal* than the control or live *S. alvi* groups. Total N = 54 bees from one hive. \*\*\* = P < 0.001, \*\* = P < 0.01, \* = P < 0.05. P-values obtained using Tukey Honest Significant Difference method.

Supplementary Table 1 qPCR primer sequences for gene expression analysis

| Gene                 | Source     | Forward                | Reverse                 |
|----------------------|------------|------------------------|-------------------------|
| <b>Abaecin</b>       | [23]       | TCGGATTGAATGGTCCTGAC   | ATCTTCGCACTACTCGCCAC    |
| <b>Apidaecin</b>     | [23]       | GTAGGTCGAGTAGGCCGATCT  | TTTTGCCTTAGCAATTCTTGTTG |
| <b>Cactus-1</b>      | [53]       | CTATCGTGGAGAACTGCGTAT  | TCAGGAAGTGGTTCTGGTATTG  |
| <b>Cactus-2</b>      | [53]       | ATCAGACGGCTCTGCTCTAT   | TCGTCTTCGTCAGTGGTATCT   |
| <b>Dorsal</b>        | [54]       | AGAGATGGAACGCAGGAAAC   | TGACAGGATATAGGACGAGGTAA |
| <b>Dredd</b>         | [54]       | GCGTCATAAAGAAAAGGATCA  | TTTCGGGTAATTGAGCAACG    |
| <b>Hymenoptaecin</b> | [55]       | GTCGTCCATCCTTGGACATT   | TTTCCCAAACCTCGAATCCTG   |
| <b>PGRP-LC</b>       | [54]       | TCCGTCAGCCGTAGTTTTTC   | CGTTTGTGCAAATCGAACAT    |
| <b>Pirk</b>          | This Study | GCCCGAAATCTAGCAAGGATAA | TTCCTCTCCTCGTCCATCTT    |
| <b>Relish</b>        | [55]       | GGAGCTGATCCAAATCGAAC   | AGTGGCATCCATCCATCATT    |
| <b>RPS18</b>         | [53]       | AGGTGTTGGTCGTCGTTAT    | CATTCTCCAGCACGCTTAT     |
| <b>Toll</b>          | [54]       | TAGAGTGGCGCATTGTCAAG   | ATCGCAATTTGTCCCAAAC     |
